# Supplementary material
Source: PubMed Central journal article supplement (PMC7774865)
Supplement: NIHMS1655187-supplement-Supplementary_Material.pdf [file NIHMS1655187-supplement-Supplementary_Material.pdf]

# Supplementary Material

## Characterizing Clinical and Neuropathological Traits of *APOE* Haplotypes in African Americans and Europeans

**Supplementary Table 1. Analysis of *APOE* haplotypes in individuals with mild cognitive impairment.** A) Haplotype analysis individuals of European descent (EU) in NACC. B) Haplotype analysis in ROSMAP. C) Haplotype analysis of African Americans (AA) in NACC. Odds ratios and *p*-values are obtained from a logistic regression model controlling for confounders and the dosages of the different haplotypes. ε3 is taken as the reference haplotype.

### A) Haplotype analysis individuals of European descent in NACC

| Name         | Haplotype | Age of onset | MCI   | CTR   | OR   | 95% CI      | P value  |
|--------------|-----------|--------------|-------|-------|------|-------------|----------|
| E3           | GTC       | 78.2         | 0.731 | 0.77  |      |             |          |
| E2           | GTT       | 79.9         | 0.061 | 0.075 | 0.8  | [0.62-1.03] | 8.60E-02 |
| E4 Ancestral | GCC       | 73.6         | 0.04  | 0.034 | 1.75 | [1.28-2.40] | 5.30E-04 |
| E4 European  | ACC       | 73.5         | 0.168 | 0.122 | 1.87 | [1.57-2.22] | 1.40E-12 |
|              |           |              | 677   | 3797  |      |             |          |

### B) Haplotype analysis in ROSMAP

| Name         | Haplotype | Age of onset | MCI   | CTR   | OR   | 95% CI      | P value  |
|--------------|-----------|--------------|-------|-------|------|-------------|----------|
| E3           | GTC       | 88.2         | 0.797 | 0.804 |      |             |          |
| E2           | GTT       | 91.3         | 0.065 | 0.104 | 0.58 | [0.41-0.83] | 3.10E-03 |
| E4 Ancestral | GCC       |              | 0.026 | 0.019 | 1.65 | [0.88-3.09] | 1.20E-01 |
| E4 European  | ACC       | 85.8         | 0.112 | 0.073 | 1.69 | [1.22-2.33] | 1.40E-03 |
|              |           |              | 362   | 674   |      |             |          |

### C) Haplotype analysis of African Americans in NACC

| Name         | Haplotype | Age of onset | MCI   | CTR   | OR   | 95% CI      | P value  |
|--------------|-----------|--------------|-------|-------|------|-------------|----------|
| E3           | GTC       | 75.3         | 0.541 | 0.697 |      |             |          |
| E2           | GTT       | 73.4         | 0.122 | 0.121 | 1.26 | [0.64-2.49] | 5.10E-01 |
| E4 Ancestral | GCC       | 74           | 0.286 | 0.156 | 2.86 | [1.66-4.92] | 1.60E-04 |
| E4 European  | ACC       | 73.8         | 0.051 | 0.025 | 3.02 | [1.10-8.25] | 3.10E-02 |
|              |           |              | 49    | 714   |      |             |          |
